# Supplementary material
Source: HighWire-hosted journal article supplement (https://www.rcpjournals.org/highwire/filestream/7157/field_highwire_adjunct_files/0/CMJv15n4-Lepping_Supplementary.pdf)
Supplement: CMJv15n4-Lepping_Supplementary.pdf [file CMJv15n4-Lepping_Supplementary.pdf]

## Supplementary information

**Table S1. Summary of studies included with results.**

| Author (year)                 | Patient group | Setting | Sample size                  | Tool used                 | Results (incapacity rates in %) | Notes                                               |
|-------------------------------|---------------|---------|------------------------------|---------------------------|---------------------------------|-----------------------------------------------------|
| Grisso (1997) <sup>35</sup>   | Psychiatry    | IP      | 40                           | MacCAT-T                  | 33%                             | Matched with controls                               |
| Grisso (1995) <sup>34</sup>   | Psychiatry    | IP      | SZ, 75; Dep, 92              | MacCAT-T                  | SZ, 52%; Dep, 24%               |                                                     |
| Hoffman (1992) <sup>17</sup>  | Psychiatry    | IP      | 60                           | Semi-structured interview | 65%                             | Voluntary/incapacity, 44%; detained/incapacity, 86% |
| Melamed (1997) <sup>39</sup>  | Psychiatry    | IP      | 113                          | Competency questionnaire  | 75%                             |                                                     |
| Fraguas (2007) <sup>12</sup>  | Psychiatry    | IP      | 160                          | Competency questionnaire  | 43.8%                           |                                                     |
| Cairns (2005) <sup>32</sup>   | Psychiatry    | IP      | 112                          | MacCAT-T                  | 43.8%                           | Detained/incapacity, 61%                            |
| Owen (2009) <sup>15</sup>     | Psychiatry    | IP      | 200                          | MacCAT-T                  | 58%                             | Voluntary patient incapacity, 24%                   |
| Kovnick (2003) <sup>21</sup>  | Psychiatry    | IP      | 27                           | MacCAT-CR                 | 67%                             | Matched with controls                               |
| Cohen (2004) <sup>9</sup>     | Psychiatry    | IP      | SZ, 21; Dep, 22              | MacCAT-CR                 | SZ, 100%; Dep, 41%              | Matched with controls                               |
| Bean (1996) <sup>16</sup>     | Psychiatry    | IP      | 96                           | CIS competency            | 29%                             | Patients referred for electroconvulsive therapy     |
| Beckett (2006) <sup>10</sup>  | Psychiatry    | IP      | 50                           | Interview, 62             | 62%                             | Mania                                               |
| Kitamura (1998) <sup>19</sup> | Psychiatry    | IP      | 25                           | SICIATRI                  | 24%                             |                                                     |
| Morris (1993) <sup>25</sup>   | Psychiatry    | IP      | Moderate LD, 15; mild LD, 15 | Vignette                  | Moderate LD, 40%; mild LD, 6%   | Matched with controls                               |
| Billick (1996) <sup>11</sup>  | Psychiatry    | IP      | 20                           | Interview                 | 25%                             |                                                     |
| Wong (2005) <sup>38</sup>     | Psychiatry    | IP      | 81                           | MacCAT-T                  | 66%                             |                                                     |
| Roth (1982) <sup>30</sup>     | Psychiatry    | IP      | 57                           | Questionnaire             | 29%                             | ECT                                                 |
| Paul (1999) <sup>28</sup>     | Psychiatry    | IP      | 40                           | Questionnaire             | 95%                             |                                                     |
| Appelbaum (1981) <sup>5</sup> | Psychiatry    | IP      | 50                           | Interview                 | 62%                             | 86% for clinical criterion                          |
| Bellhouse (2003) <sup>8</sup> | Psychiatry    | IP      | Psychosis, 12; Dep, 14       | Interview                 | Psychosis, 50%; Dep, 14%        |                                                     |
| Appelbaum (1998) <sup>6</sup> | Psychiatry    | IP      | 100                          | Vignettes                 | 47%                             |                                                     |
| Norko (1990) <sup>27</sup>    | Psychiatry    | IP      | 100                          | 15-item questionnaire     | 30%                             | Combined legal and clinical, 50%                    |
| Palmer (2002) <sup>7</sup>    | Psychiatry    | OP      | 16                           | MacCAT-T                  | 25%                             | Adult and older people                              |
| Dunn (2002) <sup>22</sup>     | Psychiatry    | OP      | 102                          | 20-item questionnaire     | 80%                             | Matched with controls                               |
| Wong (2000) <sup>37</sup>     | Psychiatry    | OP      | SZ, 21; Dem, 21; LD, 20      | Semi-structured interview | SZ, 10%; Dem, 67%; LD, 35%      | Matched with controls                               |
| Moser (2002) <sup>13</sup>    | Psychiatry    | IP/OP   | 25                           | MacCAT-T                  | 20%                             |                                                     |
| Dunn (2007) <sup>23</sup>     | Psychiatry    | IP/OP   | 91                           | MacCAT-CR                 | 57%                             |                                                     |
| Candilis (2008) <sup>29</sup> | Psychiatry    | IP/OP   | 52                           | MacCAT-CR                 | 31%                             | Matched with controls                               |
| Vollmann (2003) <sup>36</sup> | Psychiatry    | IP/OP   | Dem, 31; Dep, 35; SZ, 43     | MacCAT-T                  | Dem, 67.7; Dep, 20; SZ, 53.5    |                                                     |

(Continued)

Table S1. (Continued)

| Author (year)                  | Patient group              | Setting       | Sample size                                   | Tool used                         | Results (incapacity rates in %)                    | Notes                                     |
|--------------------------------|----------------------------|---------------|-----------------------------------------------|-----------------------------------|----------------------------------------------------|-------------------------------------------|
| Skipworth (2012) <sup>18</sup> | Forensic psychiatry        | IP/OP         | 109                                           | MacCAT-T                          | 32 %                                               | LD/delirium/cognitive impairment excluded |
| Kennedy (2009) <sup>24</sup>   | Forensic psychiatry        | IP            | 88                                            | MacCAT-T                          | 33 %                                               |                                           |
| Gilman (2003) <sup>31</sup>    | Forensic psychiatry        | IP            | 13                                            | MacCAT                            | 92 %                                               |                                           |
| Moser (2004) <sup>14</sup>     | Forensic psychiatry        | OP/<br>prison | 30                                            | MacCAT-CR                         | 3.4 %                                              | Matched with controls                     |
| Billick (1998) <sup>33</sup>   | CAMHS                      | IP            | 25                                            | CQ-chp                            | 28 %                                               |                                           |
| Maxmin (2009) <sup>20</sup>    | Old-age Psychiatry         | IP            | 99                                            | MacCAT-T                          | 68 %                                               |                                           |
| Mukherjee (2001) <sup>26</sup> | Old-age psychiatry         | IP            | 65                                            | Interview                         | 48 %                                               |                                           |
| Ranjith (2004) <sup>40</sup>   | Medical-liaison psychiatry | IP            | 31                                            | Interview by psychiatrists        | 35.5 %                                             |                                           |
| Raymont (2004) <sup>4</sup>    | Medical                    | IP            | 302                                           | MacCAT-T                          | 40 %                                               |                                           |
| Grisso (1995) <sup>34</sup>    | Medical                    | IP            | 82                                            | MacCAT-T                          | 12 %                                               | Angina                                    |
| Billick (1997) <sup>54</sup>   | Medical                    | IP            | 100                                           | CQ-med                            | 4 %                                                | Adult and old age                         |
| Etchells (1999) <sup>45</sup>  | Medical                    | IP            | 100                                           | Aid to capacity                   | 30 %                                               |                                           |
| Ripley (2008) <sup>52</sup>    | Medical                    | IP            | 20                                            | Interview                         | 47 %                                               |                                           |
| Etchells (1997) <sup>44</sup>  | Medical                    | IP            | 48                                            | Interview by psychiatrists        | 18.7 %                                             | Excluded coma                             |
| Fassassi (2009) <sup>53</sup>  | Medical                    | IP            | 195                                           | Specific Silberfeld questionnaire | 26.7 %                                             |                                           |
| Fitten (1990) <sup>47</sup>    | Medical                    | IP            | 25                                            | Hypothetical vignette             | 28 %                                               | Matched with controls                     |
| Kitamura (1998) <sup>19</sup>  | Medical                    | IP            | 23                                            | SICIATRI                          | 9 %                                                |                                           |
| Barton (1996) <sup>42</sup>    | Medical                    | IP            | 44                                            | Hopkins competency assessment     | 45 %                                               | Nursing home                              |
| Fitten (1990) <sup>46</sup>    | Medical                    | IP            | 51                                            | Vignettes                         | 67 %                                               | Nursing home; physicians, 23 %            |
| Martin (2008) <sup>49</sup>    | Medical                    | IP            | PD with Dem, 16;<br>PD without Dem, 16        | CCTI                              | PD with Dem, 81 %;<br>PD without Dem, 31 %         |                                           |
| Vellinga (2004) <sup>57</sup>  | Medical                    | OP            | 80                                            | Vignette                          | 24 %                                               | Physician, 4 %; family member, 28 %       |
| Karlawish (2005) <sup>48</sup> | Medical                    | OP            | 48                                            | Interviews                        | 60 %                                               | Mild/moderate AD, matched with controls   |
| Okonwo (2007) <sup>50</sup>    | Medical                    | OP            | Mild cognitive impairment, 60;<br>mild AD, 31 | CCTI                              | Mild cognitive impairment, 53 %;<br>mild AD, 100 % |                                           |
| Arcscott (1999) <sup>41</sup>  | Medical                    | OP            | 40                                            | Vignette                          | 87.5                                               | Learning disability                       |

(Continued)

**Table S1. (Continued)**

| Author (year)                 | Patient group | Setting | Sample size                                 | Tool used                                   | Results (incapacity rates in %)                  | Notes                         |
|-------------------------------|---------------|---------|---------------------------------------------|---------------------------------------------|--------------------------------------------------|-------------------------------|
| Dymek (2001) <sup>43</sup>    | Medical       | OP      | 20                                          | Capacity to consent to treatment instrument | 80 %                                             | PD, old age                   |
| Triebel (2009) <sup>56</sup>  | Medical       | OP      | 26                                          | CCTI                                        | 53.8 %                                           | Glioma, matched with controls |
| Moser (2002) <sup>13</sup>    | Medical       | IP/OP   | 25                                          | MacCAT-T                                    | 4 %                                              | HIV patients                  |
| Candilis (2008) <sup>29</sup> | Medical       | IP/OP   | 51                                          | MacCAT-CR                                   | 2 %                                              |                               |
| Rahman (2012) <sup>51</sup>   | Medical       | IP/OP   | PEG, 72; IP endoscopy, 68; OP endoscopy, 69 | MacCAT-T                                    | PEG, 74 %; IP endoscopy, 22 %; OP endoscopy, 3 % |                               |
| Billick (2001) <sup>55</sup>  | Paediatric    | OP      | 67                                          | CQ-peds                                     | 2.9 %                                            |                               |

Owen 2008<sup>58</sup> was not included as it does not consistently use a validated tool. However, one subgroup from this study is included in Owen 2009.<sup>15</sup> AD = Alzheimer's disease; CAMHS = child and adolescent mental health services; CCTI = capacity to consent to treatment instrument ; CQ-chp = competency questionnaire in child psychiatry; CQ-med = competency questionnaire for consent to hospitalisation in general hospital patients ; CQ-ped = competency questionnaire for pediatric patients; Dem = dementia; Dep = depression; IP = inpatient; LD = learning disability; MacCAT-CR = MacArthur Competence Assessment Tool for Clinical Research; MacCAT-T = MacArthur Competence Assessment Tool for Treatment; OP = outpatient; PD = Parkinson's disease; SICIATRI = structured interview for competency and incompetency assessment testing and ranking inventory; SZ = schizophrenia.
